# Supplementary material
Source: Springer Nature journal article supplement (https://www.springermedizin.de/resource/supplementary/12872_2005_94_MOESM1_ESM.pdf/9431064)

**A x 3000**

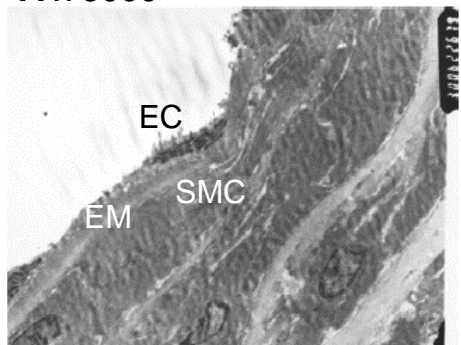

**E x 3000**

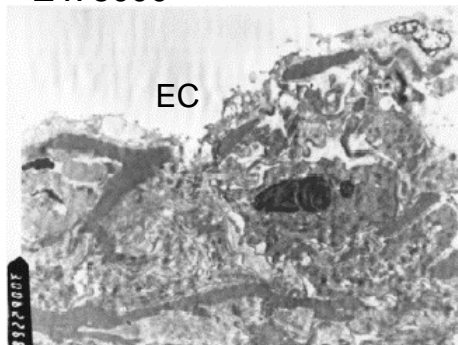

**B x 5000**

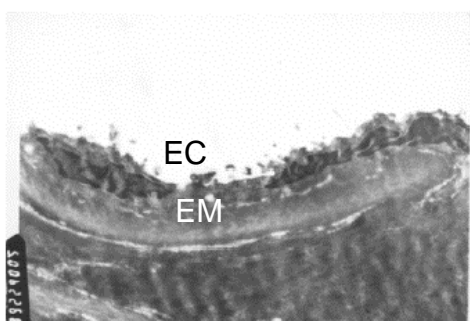

**F x 5000**

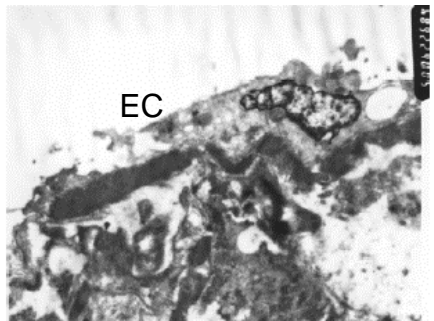

**C x 10000**

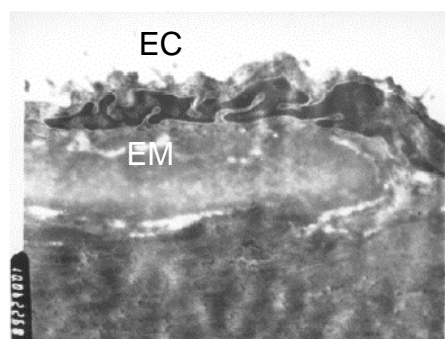

**G x 10000**

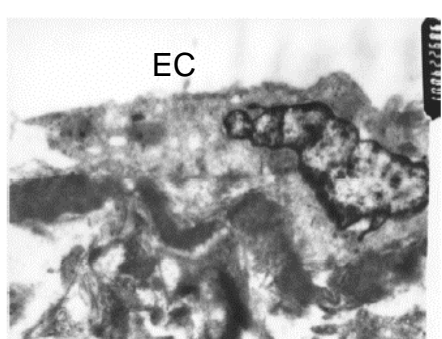

**D x 5000**

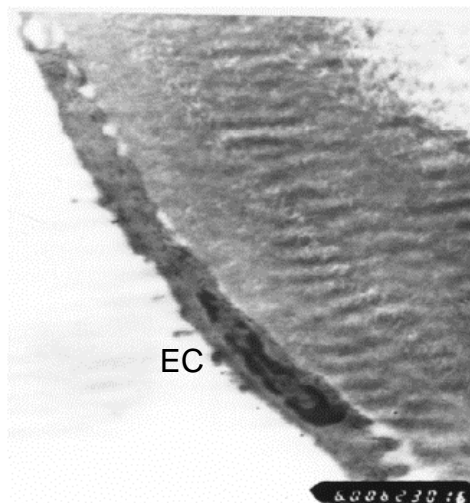

**H x 5000**

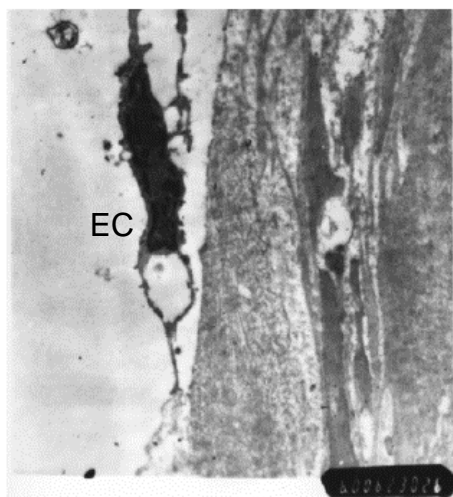

Supplement: MOESM1 [file 9431064]
